# Supplementary material
Source: publisher site journal article supplement (https://www.spandidos-publications.com/6568/downloadSupplementary)
Supplement: Supplementary file 1 [file downloadSupplementary]

Table SI. Summary of individual clinical cases of sarcomatoid carcinoma of the pancreas.

| First author/s, year           | Case | Age, years | Sex | Tumor location | Tumor size, cm | Imaging findings (diagnosis)                                                                 | Surgery                                                                 | Resection margin status <sup>a</sup> | Adjuvant therapy              | Carcinoma                  | LN status | LVI | PI  | Tumor extent                | Sarcomatoid compartment                                              | Follow-up, months | Outcome         | (Refs.) |
|--------------------------------|------|------------|-----|----------------|----------------|----------------------------------------------------------------------------------------------|-------------------------------------------------------------------------|--------------------------------------|-------------------------------|----------------------------|-----------|-----|-----|-----------------------------|----------------------------------------------------------------------|-------------------|-----------------|---------|
| Higashi <i>et al</i> , 1999    | 1    | 74         | M   | PH             | 4.5x4x3        | Hypovascularity. Leiomyoma or leiomyosarcoma                                                 | Pylorus-preserving pancreatoduodenectomy                                | R0                                   | NA                            | PD adenocarcinoma          | No        | Yes | Yes | Duodenal invasion           | Pan-CK, EMA, MUC1-ARA, S-100, SMA (+); vimentin, NSE, desmin (-)     | 3                 | Died of disease | (7)     |
| De la Riva <i>et al</i> , 2006 | 2    | 72         | F   | PH             | NA             | Dilation of the CBD and pancreatic duct.                                                     | Biopsy                                                                  | NA                                   | NA                            | NA                         | NA        | NA  | NA  | NA                          | CK, vimentin (+)                                                     | 9                 | Died of disease | (8)     |
| Yao <i>et al</i> , 2013        | 3    | 48         | M   | PT             | 10x8x5         | Cystic and solid mass. Cystadenoma                                                           | Laparoscopic spleen-preserving left pancreatectomy                      | R0                                   | Gemcitabine                   | PD adenocarcinoma          | NA        | NA  | NA  | NA                          | Vimentin (+); CK 18 (-)                                              | 3                 | Died of disease | (9)     |
| Ren <i>et al</i> , 2013        | 4    | 48         | M   | PT             | 10x8x3.5       | Cystadenoma                                                                                  | NA                                                                      | NA                                   | Interventional chemotherapy   | MD adenocarcinoma          | No        | NA  | NA  | NA                          | AACT, CK19, CK18, pan-CK, vimentin (+)                               | 36                | Alive and well  | (10)    |
| Kane <i>et al</i> , 2014       | 5    | 85         | M   | PB             | 3.3x3.0x2.6    | Cystic mass. Homogeneously enhanced. MPD obstruction. Adenocarcinoma or neuroendocrine tumor | Laparoscopic distal pancreatectomy, splenectomy and partial gastrectomy | R0                                   | NA                            | PD adenocarcinoma          | Yes       | No  | Yes | Stomach invasion            | Pan-CK, CK5.2, vimentin (+); MUC-1, S-100, SMA, EMA (-); Ki-67 (50%) | 26                | Alive and well  | (11)    |
| Lu <i>et al</i> , 2014         | 6    | 58         | F   | PT             | 16x18          | Solid-cystic mass. Heterogeneous enhancement. Cystadenocarcinoma                             | En bloc resection of the distal pancreatic tumor                        | R0                                   | Chinese medicine and thymosin | WD squamous adenocarcinoma | 17/22     | NA  | NA  | Stomach and spleen invasion | CK7 and Vimentin (+); E-cadherin (-)                                 | 5                 | Alive           | (12)    |
| Yepuri <i>et al</i> , 2018     | 7    | 64         | F   | PH             | 3.7x3.6        | NA                                                                                           | Biopsy                                                                  | NA                                   | Palliative radiotherapy       | NA                         | NA        | NA  | NA  | NA                          | CD56, vimentin (+); epithelial markers (-)                           | 3                 | Died of disease | (13)    |
| Xie <i>et al</i> , 2018        | 8    | 63         | M   | PH             | 2.5x2x1.8      | Dilation of bile ducts and gallbladder with abrupt narrowing at the distal CBD               | Pancreatoduodenectomy                                                   | R0                                   | Thymopetide                   | MD adenocarcinoma          | No        | No  | Yes | Distal CBD invasion         | CK7, CK19, vimentin (+)                                              | 18                | Died of disease | (14)    |
| Bukhari <i>et al</i> , 2019    | 9    | 64         | M   | PH             | 2.4x2x1.9      | NA                                                                                           | Pancreatoduodenectomy with cholecystectomy                              | R0                                   | Gemcitabine                   | PD adenocarcinoma          | 0/12      | No  | No  | No                          | Vimentin (+); CAM 5.2 (-)                                            | 19                | Alive and well  | (15)    |
| Zhou <i>et al</i> , 2019       | 10   | 59         | M   | PH             | 2.5x2.5x2.0    | Dilation of bile duct and pancreatic duct                                                    | Pancreatoduodenectomy                                                   | R0                                   | NA                            | NA                         | 3/22      | NA  | NA  | NA                          | CK19, vimentin (+); S-100, HMB45, SMA (-); Ki-67 (50%)               | 6                 | Died of disease | (16)    |

|                            |    |    |   |    |             |                                                                          |                                                                        |    |                                           |                             |      |     |                             |                                     |                                                                         |                 |                 |      |
|----------------------------|----|----|---|----|-------------|--------------------------------------------------------------------------|------------------------------------------------------------------------|----|-------------------------------------------|-----------------------------|------|-----|-----------------------------|-------------------------------------|-------------------------------------------------------------------------|-----------------|-----------------|------|
| Toledo <i>et al</i> , 2021 | 11 | 61 | F | PT | 3.2×2.9     | Solid mass. Hypovascular. Dilation of the MPD.                           | Pancreatectomy with splenectomy                                        | R0 | No                                        | MD adenocarcinoma           | 1/30 | Yes | No                          | No                                  | Pan-CK, SMA, vimentin (+); CD68 (-)                                     | 35              | Alive and well  | (17) |
| Lim <i>et al</i> , 2021    | 12 | 64 | F | PT | 5.4×4       | Solid-cystic mass. Heterogeneously enhanced. Mucinous cystadenocarcinoma | Distal pancreatectomy with splenectomy and colonic segmental resection |    | Gemcitabine and abraxane                  | PD mucinous cystic neoplasm | NA   | NA  | NA                          | NA                                  | Pan-CK, vimentin (+); CD56(-)                                           | 10              | Died of disease | (18) |
| Hara <i>et al</i> , 2022   | 13 | 63 | M | PH | NA          | MPD obstruction with MPD dilation                                        | Subtotal stomach-preserving pancreatoduodenectomy                      | R0 | NA                                        | Adenocarcinoma              | NA   | NA  | NA                          | NA                                  | CAM5.2, pan-CK (+); S-100, desmin (-)                                   | 120             | Alive and well  | (19) |
| Zhang <i>et al</i> , 2023  | 14 | 83 | M | PH | 4.1         | Calcified mass                                                           | Pancreatoduodenectomy                                                  | R0 | NA                                        | Osteosarcomatous            | NA   | No  | No                          | No                                  | Pan-CK, CK19, CAM5.2 (+)                                                | 4               | Alive and well  | (20) |
| Chen <i>et al</i> , 2014   | 15 | 48 | M | PT | 10x8x3.5    | Cystic mass Cystadenoma                                                  | Biopsy                                                                 | NA | No                                        | NA                          | NA   | NA  | NA                          | Colon invasion                      | AACT, pan-CK, CK8-18, CK19, vimentin (+)                                | 3               | Died of disease | (21) |
| Hu <i>et al</i> , 2015     | 16 | 61 | M | PH | 4.5x7.1     | Cystic mass. Cystadenocarcinoma                                          | Puncture biopsy                                                        | NA | Radiation therapy                         | NA                          | NA   | NA  | NA                          | NA                                  | CK7, CK, CAM5.2, vimentin (+); CK20, SMA, Desmin (-); Ki-67(30%)        | 13              | Alive           | (22) |
| Zhao <i>et al</i> , 2018   | 17 | 60 | M | PT | 12.5x9.4    | Heterogeneously enhanced                                                 | Puncture biopsy                                                        | NA | Docetaxel, oxaliplatin and tegafur        | NA                          | NA   | NA  | NA                          | NA                                  | Pan-CK, CAM5.2, vimentin (+); S-100, HMB45, SMA (-); Ki67(50%)          | 2               | Died of disease | (23) |
| Jiang <i>et al</i> , 2019  | 18 | 73 | M | PH | 2.5×2.0×2.0 | Heterogeneously enhanced. Dilation of bile duct and pancreatic duct      | Pancreatoduodenectomy                                                  | R0 | Traditional Chinese medicine              | NA                          | No   | NA  | NA                          | NA                                  | CK, CK19, vimentin (+); SMA, E-cadherin, desmin, S-100 (-); Ki-67 (30%) | 14              | Alive           | (24) |
| Ren <i>et al</i> , 2019    | 19 | 58 | M | PT | 20x18       | Solid-cystic mass. Heterogeneously enhanced                              | Radical resection of pancreatic tail tumor                             | NA | Traditional Chinese medicine and thymosin | NA                          | Yes  | NA  | Stomach and spleen invasion | CK7, vimentin (+)                   | 9                                                                       | Died of disease | (25)            |      |
|                            | 20 | 60 | M | PB | 3.5x4.5     | Circle wise enhanced                                                     | Distal pancreatectomy with splenectomy                                 | R0 | NA                                        | NA                          | No   | NA  | NA                          | CK7, EMA, vimentin (+); Ki-67 (30%) | 4                                                                       | Died of disease |                 |      |

|                            |    |    |   |    |               |                                                                                       |                                                            |    |                                                    |                   |       |     |     |                                  |                                                                                        |     |                 |      |
|----------------------------|----|----|---|----|---------------|---------------------------------------------------------------------------------------|------------------------------------------------------------|----|----------------------------------------------------|-------------------|-------|-----|-----|----------------------------------|----------------------------------------------------------------------------------------|-----|-----------------|------|
| Kimura <i>et al</i> , 2020 | 21 | 58 | M | PB | Diameter:5    | Cystic and solid mass. MPD obstruction with distal MPD dilation                       | Distal pancreatectomy with splenectomy                     | NA | Gemcitabine                                        | MD adenocarcinoma | 3/4   | NA  | NA  | Splenic artery and vein invasion | CK, vimentin, p-Smad2/3, snail, fibronectin, $\gamma$ -H2AX, p53, p21 (+); Ki-67 (11%) | 120 | Alive and well  | (26) |
| Kimura <i>et al</i> , 2021 | 22 | 68 | M | NA | Diameter:4    | NA                                                                                    | Distal pancreatectomy                                      | NA | Chemotherapy                                       | NA                | NA    | NA  | NA  | NA                               | p-Smad2/3, snail, fibronectin (+); Ki-67 (19%)                                         | 18  | Died of disease | (27) |
|                            | 23 | 65 | F | NA | Huge tumor    | NA                                                                                    | Biopsy                                                     | NA | Cisplatin                                          | NA                | NA    | NA  | NA  | NA                               | p-Smad2/3, snail, fibronectin (+); Ki-67 (32%)                                         | 2   | Died of disease |      |
| Blair <i>et al</i> , 2017  | 24 | 67 | F | NA | Diameter: 4   | NA                                                                                    | Pancreatoduodenectomy                                      | R2 | None                                               | NA                | 1/7   | No  | No  | No                               | NA                                                                                     | 2   | Died of disease | (28) |
|                            | 25 | 80 | F | NA | Diameter: 5   | NA                                                                                    | Pancreatoduodenectomy                                      | R0 | No                                                 | NA                | 1/20  | Yes | Yes | No                               | NA                                                                                     | 1   | Alive           |      |
|                            | 26 | 63 | F | NA | Diameter: 5.7 | NA                                                                                    | Distal pancreatectomy                                      | R1 | No                                                 | NA                | 2/32  | No  | Yes | No                               | NA                                                                                     | 1   | Died of disease |      |
|                            | 27 | 56 | F | NA | Diameter: 5   | NA                                                                                    | Total pancreatectomy                                       | R0 | Capecitabine                                       | NA                | 0/10  | No  | No  | No                               | NA                                                                                     | 3   | Alive           |      |
|                            | 28 | 79 | M | NA | Diameter:4    | NA                                                                                    | Pancreatoduodenectomy                                      | R0 | No                                                 | NA                | 13/17 | Yes | Yes | No                               | NA                                                                                     | 3   | Died of disease |      |
|                            | 29 | 54 | M | NA | Diameter: 3   | NA                                                                                    | Distal pancreatectomy                                      | R0 | Gemcitabine, capecitabine and radiation            | NA                | 0/27  | No  | No  | No                               | NA                                                                                     | 61  | Alive and well  |      |
|                            | 30 | 65 | M | NA | Diameter: 15  | NA                                                                                    | Distal pancreatectomy                                      | R0 | No                                                 | NA                | 29/38 | Yes | Yes | No                               | NA                                                                                     | 3   | Died of disease |      |
| Present study              | 31 | 73 | F | NA | Diameter: 9   | NA                                                                                    | Pancreatoduodenectomy with total gastrectomy               | R0 | Radiation                                          | NA                | 1/24  | No  | No  | No                               | NA                                                                                     | 188 | Alive and well  |      |
|                            | 32 | 76 | F | PT | 11x10x9       | Cystic-solid mass. Heterogeneously enhanced                                           | Distal pancreatectomy, splenectomy and partial enterectomy | R0 | Olaparib and tislelizumab                          | MD adenocarcinoma | 0/8   | Yes | Yes | Colon invasion                   | Pan-CK, CK7, CK19, EMA, vimentin (+); Ki-67 (90%)                                      | 24  | Alive and well  | -    |
|                            | 33 | 65 | M | PB | 4.1x2.8       | NA                                                                                    | Biopsy                                                     | NA | Paclitaxel, gemcitabine, camrelizumab and thymosin | Adenocarcinoma    | NA    | NA  | NA  | NA                               | Pan-CK, CK8/18, AACT, vimentin (+); Desmin, S-100, SMA (-); Ki-67 (40%)                | 25  | Alive and well  |      |
|                            | 34 | 71 | F | PH | 4x4x3         | Heterogeneously enhanced. Dilation of bile duct and pancreatic duct. Cholecystectasia | Pancreatoduodenectomy with cholecystectomy                 | R0 | Paclitaxel and gemcitabine                         | PD adenocarcinoma | 5/25  | Yes | Yes | Duodenal invasion                | Pan-CK, CAM5.2, EMA, CK7, CK19, CK5/6,                                                 | 10  | Died of disease |      |

|    |    |   |    |         |                                                                |                                                     |    |            |                   |      |     |     |                   |                                                                              |    |                 |
|----|----|---|----|---------|----------------------------------------------------------------|-----------------------------------------------------|----|------------|-------------------|------|-----|-----|-------------------|------------------------------------------------------------------------------|----|-----------------|
| 35 | 64 | M | PH | 4x3x3   | CBD obstruction with dilation of bile duct and pancreatic duct | Pancreatoduodenectomy with cholecystectomy          | R0 | No         | PD adenocarcinoma | 6/28 | Yes | Yes | No                | Muc-1 (+)<br>NA                                                              | 10 | Died of disease |
| 36 | 69 | M | PB | 3x2.5x2 | Dilation of pancreatic duct                                    | Laparoscopic distal pancreatectomy with splenectomy | R0 | Tegafur    | PD adenocarcinoma | 1/24 | Yes | Yes | No                | NA                                                                           | 21 | Alive and well  |
| 37 | 88 | F | PB | 12x4x3  | NA                                                             | Total pancreatectomy with splenectomy               | R0 | No         | Adenocarcinoma    | 1/6  | Yes | Yes | Stomach invasion  | Pan-CK, CAM5.2, CK7, CK19, vimentin (+); Desmin, S-100, SMA (-); Ki-67 (30%) | 3  | Died of disease |
| 38 | 51 | M | PH | 2.5x2   | NA                                                             | Pancreatoduodenectomy with cholecystectomy          | R0 | Folfinirox | PD adenocarcinoma | 0/8  | Yes | Yes | Duodenal invasion | NA                                                                           | 8  | Died of disease |

<sup>a</sup>The tumor status following treatment is described by the residual tumor classification: R0, no residual tumor; R1, microscopic residual tumor; R2, macroscopic residual tumor, according to the literature (36). PH, pancreatic head; M, male; F, female; PB, pancreatic body; PT, pancreatic tail; NA, not available; CK, cytokeratin; AACT, anti-alpha-1-antichymotrypsin; EMA, epithelial membrane antigen; SMA, smooth muscle actin; MUC1, transmembrane glycoprotein mucin 1; NSE, neuron-specific enolase; p, phosphor; LVI, lymphovascular invasion; PNI, perineural invasion; LN, lymph node; CBD, common bile duct; MPD, main pancreatic duct; PD, poorly-differentiated; MD, moderately-differentiated; WD, well-differentiated
